# Supplementary material for: Encapsulation and Enhanced Release of Resveratrol from Mesoporous Silica Nanoparticles for Melanoma Therapy
Source: PubMed Central journal article supplement (PMC8000002; doi:10.3390/ma14061382), 2021-03-12
Supplement: materials-14-01382-s001.pdf [file materials-14-01382-s001.pdf]

Supplementary Material

# Encapsulation and Enhanced Release of Resveratrol from Mesoporous Silica Nanoparticles for Melanoma Therapy

Diogo Marinheiro <sup>1</sup>, Bárbara J. M. L. Ferreira <sup>1,\*</sup>, Párastu Oskoei <sup>2</sup>, Helena Oliveira <sup>2</sup> and Ana L. Daniel-da-Silva <sup>1,\*</sup>

<sup>1</sup> Department of Chemistry & CICECO-Aveiro Institute of Materials, University of Aveiro, 3810-193 Aveiro, Portugal; diogomarinheiro@ua.pt (D.M.); barbaraferreira@ua.pt (B.J.M.L.F.); ana.luisa@ua.pt (A.L.D.-d.-S.)

<sup>2</sup> Department of Biology & CESAM-Centre for Environmental and Marine Studies, University of Aveiro, 3810-193 Aveiro, Portugal; parastu.oskoei@ua.pt (P.O.); holiveira@ua.pt (H.O.)

## A. UV-Vis calibration curves for RES quantification

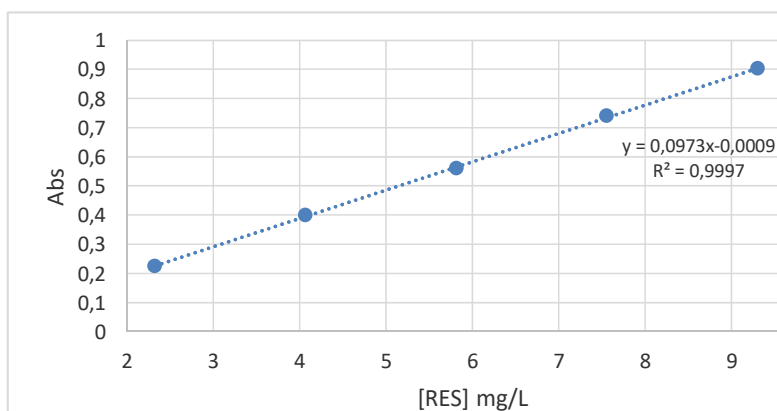

Figure S1. Calibration curve for RES quantification in PBS pH 7.4.

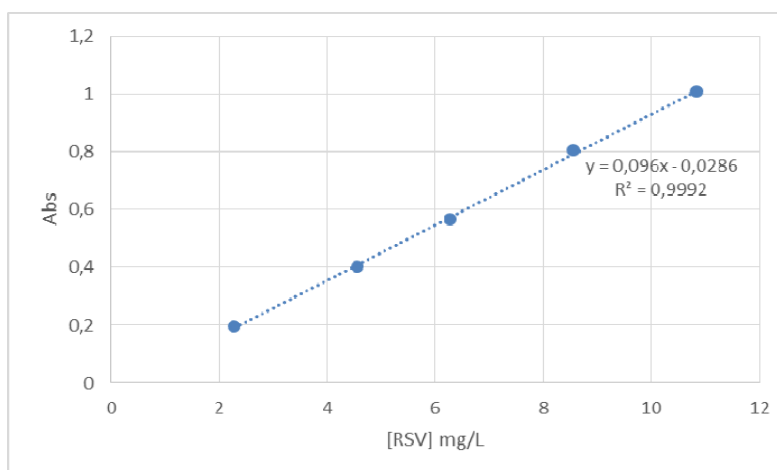

Figure S2. Calibration curve for RES quantification in PBS pH 5.2.

## B. Resveratrol stability to isomerization during release studies

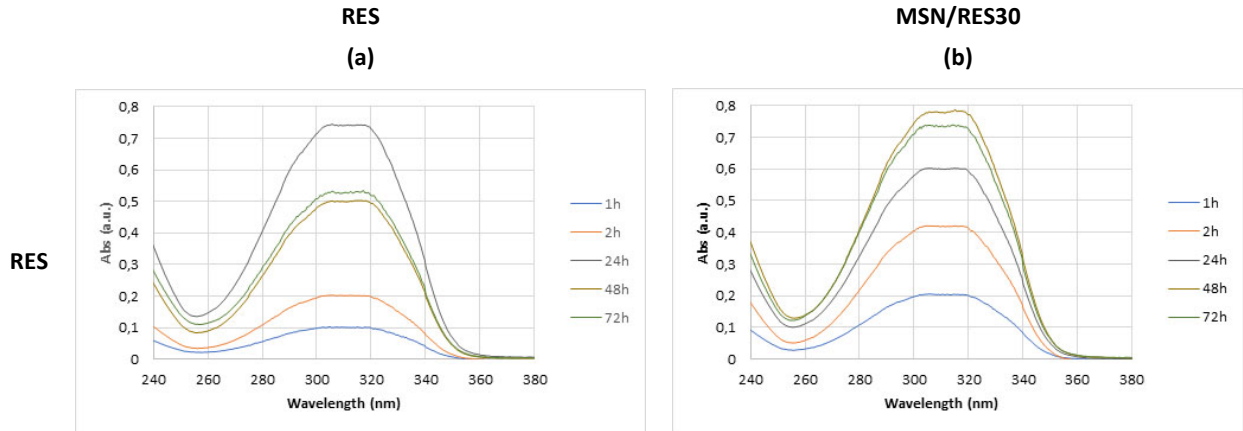

**Figure S3.** UV-Vis spectra (240-380 nm) of aliquots extracted along time during RES release studies at pH 5.2 of the (a) non-encapsulated RES and (b) loaded sample MSN/RES30.

### C. Comparison of immersion and evaporation loading methods

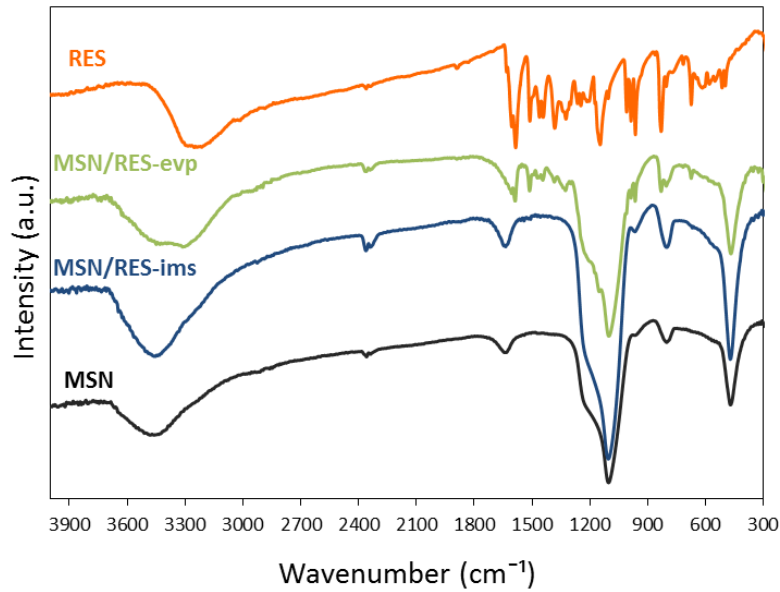

**Figure S4.** FTIR spectra of pristine MSNs, RES and loaded MSNs using the immersion (MSN/RES-*ims*) and the evaporation (MSN/RES-*evp*) methods. The amount of MSNs (100 mg) and RES (40 mg) available for loading was identical in both methods.

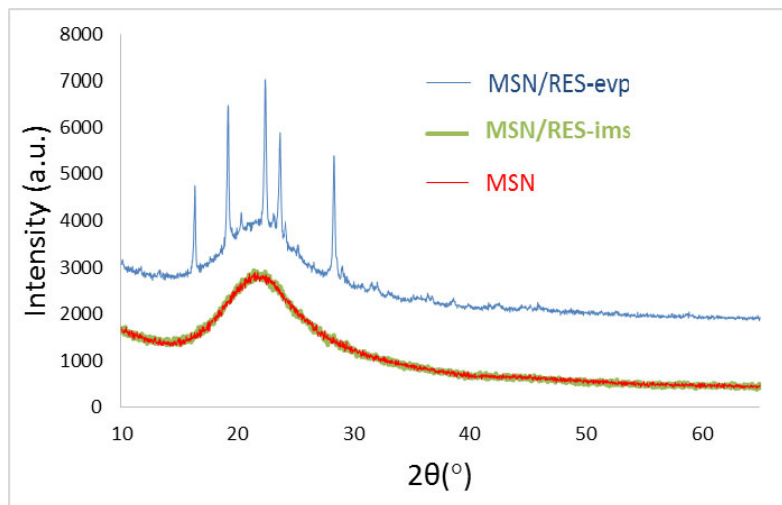

**Figure S5.** Wide angle XRD of pristine MSNs and loaded MSNs using the immersion (MSN/RES-*ims*) and the evaporation (MSN/RES-*evp*) methods.

#### D. Characterization of RES loaded MSNs

**Table S1.** Elemental analysis of MSNs and loaded samples MSN/RES30 and MSN/RES40

|           | <b>MSNs</b> | <b>MSN/RES30</b> | <b>MSN/RES40</b> |
|-----------|-------------|------------------|------------------|
| <b>%C</b> | 0.040       | 20.21            | 32.47            |
| <b>%H</b> | 1.424       | 2.405            | 2.915            |

**Table S2.** Melting temperature and cristallinity degree of the samples.

|                  | <b>Tpeak °C</b> | <b>Crystallinity (%)</b> |
|------------------|-----------------|--------------------------|
| <b>RES</b>       | 264.9           | -                        |
| <b>MSN/RES30</b> | 226.7           | 15.3                     |
| <b>MSN/RES40</b> | 242.5           | 19.4                     |
